# Supplementary material for: Cross-cultural adaptation and psychometric properties of the Chinese version of the Intermittent Self-Catheterization Questionnaire (ISC-Q)
Source: PeerJ journal article supplement (doi:10.7717/peerj.18226), 2024-10-07
Supplement: Appendix2.doc [file Appendix2.doc]

**Appendix 2: Sample distribution status.**

| **Hospital ID** | **Hospital Name** | **Random Sequence** | **Random Sequence Sorting** | **Hospitals sorted by random sequence** | **Number of Qs** | **Cumulative Number of Qs** | **Number of Valid Qs** | **Cumulative Number of Valid Qs** | **Sample Division** |
| --- | --- | --- | --- | --- | --- | --- | --- | --- | --- |
| 1 | The University of Hong Kong-  Shenzhen Hospital | 5 | 1 | Shenzhen Hospital,  Southern Medical University | 47 | 47 | 39 | 39 | EFA |
| 2 | Sichuan Bayi Rehabilitation Hospital | 3 | 2 | Guangdong Work Injury Rehabilitation Hospital | 71 | 118 | 69 | 108 | EFA |
| 3 | Guangdong Work Injury Rehabilitation Hospital | 1 | 3 | The University of Hong Kong-Shenzhen Hospital | 44 | 162 | 26 | 134 | EFA |
| 4 | Mianzhu City People's Hospital | 6 | 4 | Xiangyang Central Hospital | 58 | 220 | 46 | 180 | CFA |
| 5 | Shenzhen Hospital, Southern Medical University | 4 | 5 | Mianzhu City People's Hospital | 41 | 261 | 33 | 213 | CFA |
| 6 | Xiangyang Central Hospital | 7 | 6 | Henan Provincial People's Hospital | 42 | 303 | 37 | 250 | CFA |
| 7 | Henan Provincial People's Hospital | 2 | 7 | Sichuan Bayi Rehabilitation  Hospital | 102 | 405 | 88 | 338 | CFA |

***Note:*** The random sequence for hospital IDs 1 to 7 was generated using [random.org](https://www.random.org/sequences/)(<https://www.random.org/sequences/>), resulting in the sequence: 5 3 1 6 4 7 2.

***Abbreviations:***Qs, Questionnaires;EFA,Exploratory Factor Analysis;CFA (Confirmatory Factor Analysis).
